# Supplementary material
Source: Springer Nature journal article supplement (https://www.springermedizin.de/resource/supplementary/12957_2013_1408_MOESM18_ESM.pdf/9562532)

left

Vaginal cuff

Atraumatic cervical cap  
(Hohlmanipulator)

Vagina

Plexus hypogastricus inferior

SURGICAL

Ureter

Rectum

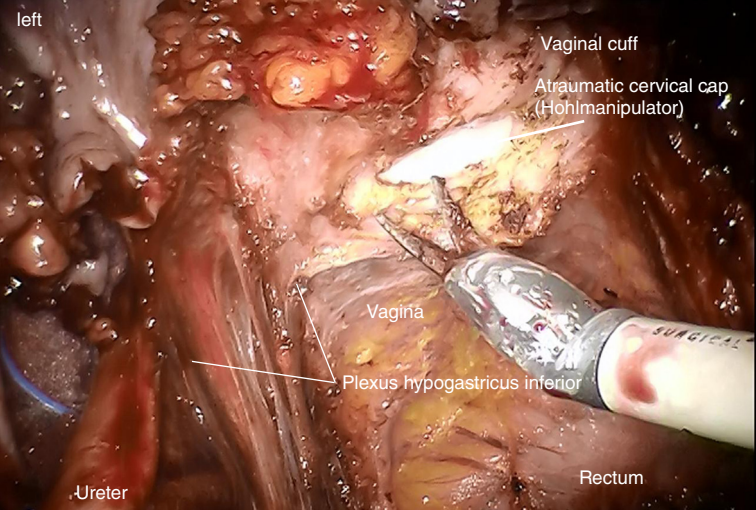

Supplement: MOESM18 [file 9562532]
